# Supplementary material
Source: publisher site journal article supplement (https://vertebrate-zoology.arphahub.com/article/94265/download/suppl/31/)

**Supplementary material.** Relevant characters to the identification of *heterodermus* species group species.

Heterogeneous dorsal scalation with surrounding granular scales (left) without surrounding granular scales (right)

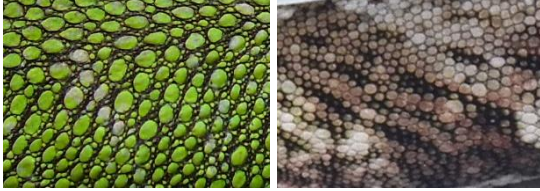

Dorsal flat scales types. type 1: scales with the same size (1-1-1) (left), type 2: a large scale and small one around half of size (1-0.5) (center) and type 3: a large scale, a second one around half of size and a third one around quarter of size (1-0.5-0.25) (right)

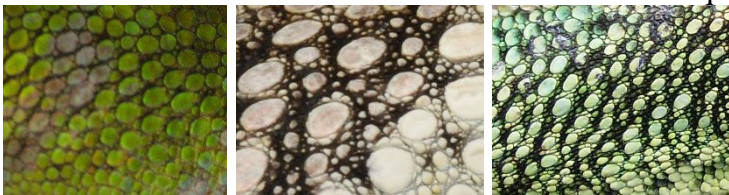

Discontinuous (left) and continuous (right) nuchal crest

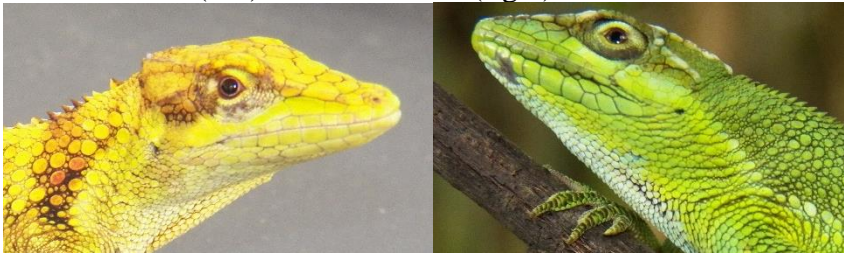

Row of enlarged sublabials to a line just below to lip commissures (left) before to lip commissures (right)

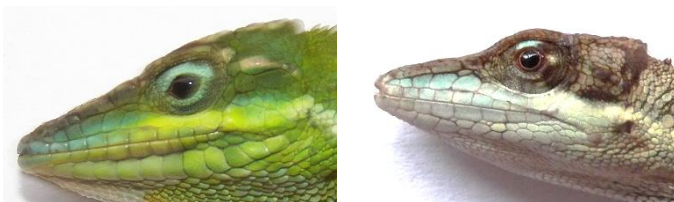

V-shaped (left) U-shaped (right) crown

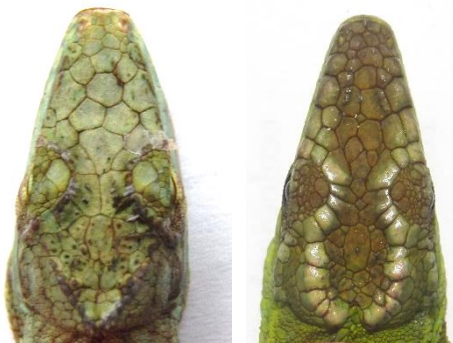

Supplement: Supplementary file 1
